# Supplementary material for: Mechanical Compression of Human Airway Epithelial Cells Induces Release of Extracellular Vesicles Containing Tenascin C
Source: MDPI journal article supplement (doi:10.3390/cells11020256), 2022-01-13
Supplement: s1 [file s1]

**Table S1.** Donor information for primary HBE cells.

| Donor | Sex | Age | Ethnicity | BMI   | Used in Figure |
|-------|-----|-----|-----------|-------|----------------|
| N1    | F   | 16  | Caucasian | 19.35 | 1              |
| N2    | F   | 23  | Caucasian | 26.18 | 1              |
| N3    | F   | 59  | Hispanic  | 27.9  | 1,2,3          |
| N4    | F   | 47  | Caucasian | 25.1  | 1,2            |
| N5    | M   | 70  | Caucasian | N/A   | 1, 2,3         |
| N6    | M   | 35  | Caucasian | 31.42 | 1,2,3,4        |
| N7    | F   | 39  | Hispanic  | 25.59 | 2              |
| N8    | M   | 50  | Caucasian | 27.3  | 2              |
| A1    | F   | 38  | Caucasian | 30.9  | 1              |
| A2    | F   | 28  | Caucasian | N/A   | 1              |
| A3    | M   | 20  | Black     | N/A   | 1              |
| A4    | F   | 59  | Caucasian | 28.5  | 1              |

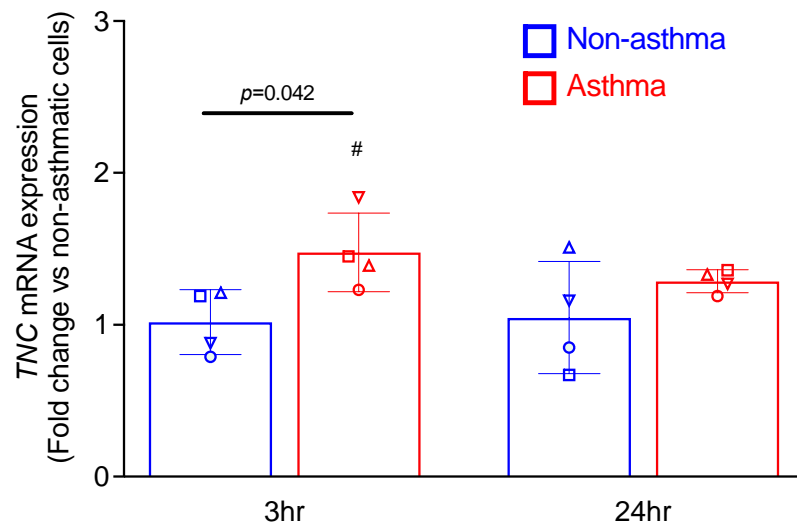

**Figure S1.** At baseline, TNC mRNA expression is marginally higher in asthmatic HBE cells at 3 h. Baseline TNC mRNA expression was measured at 3 h and 24 h in non-asthmatic (mean  $\pm$  SEM, 4 donors) and asthmatic cells (mean  $\pm$  SEM, 4 donors). #  $p < 0.05$  significantly different between non-asthma and asthma, analyzed by two-way ANOVA with Bonferroni's post-hoc test.

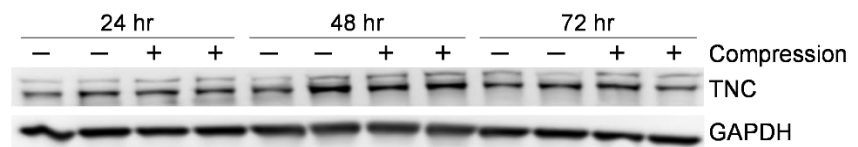

**Figure S2.** Compression does not increase the cellular expression of TNC. Representative Western blot of three independent experiments showed no change in cellular TNC by mechanical compression. GAPDH was used as a loading control.
